# Supplementary material for: Which patients benefit from physical activity on prescription (PAP)? A prospective observational analysis of factors that predict increased physical activity
Source: Springer Nature journal article supplement (doi:10.1186/s12889-019-6830-1), 2019-05-02
Supplement: MOESM1 [file 16691984]

## Additional file 1

### Additional regression analyses including covariates and adding intervention contact

We have made an additional regression analysis base on the ITT population. Using a mixed linear regression model, PA at six months is used as dependent factor and each predictor as independent fixed factor. The following random factors are included: age, sex, social situation, economy, education, smoking. The covariate intervention of care at 6 months is also included as a random factor after suggestion from reviewers.

Results are presented below and shows that Self-efficacy expectations, Readiness to change-Confident, BMI, and Physical component summary SF-36 are significant predictors. Hence, we see that these results will not change any of our previous analyses.

| Regression analysis based on the ITT population including covariates and adding intervention contact                                                                                                                                                                                                                                                |                |
|-----------------------------------------------------------------------------------------------------------------------------------------------------------------------------------------------------------------------------------------------------------------------------------------------------------------------------------------------------|----------------|
| Independent variable (baseline correlates) (n)                                                                                                                                                                                                                                                                                                      | <i>p</i> value |
| Self-efficacy expectation (299)                                                                                                                                                                                                                                                                                                                     | <b>0.047</b>   |
| Outcome expectation (286)                                                                                                                                                                                                                                                                                                                           | 0.07           |
| Enjoyment (291)                                                                                                                                                                                                                                                                                                                                     | 0.13           |
| Social support                                                                                                                                                                                                                                                                                                                                      |                |
| Family-positive (282)                                                                                                                                                                                                                                                                                                                               | 0.11           |
| Family-negative (300)                                                                                                                                                                                                                                                                                                                               | 0.87           |
| Friend-positive (280)                                                                                                                                                                                                                                                                                                                               | 0.65           |
| Readiness to change                                                                                                                                                                                                                                                                                                                                 |                |
| Prepared (318)                                                                                                                                                                                                                                                                                                                                      | 0.09           |
| Important (348)                                                                                                                                                                                                                                                                                                                                     | 0.87           |
| Confident (318)                                                                                                                                                                                                                                                                                                                                     | <b>0.002</b>   |
|                                                                                                                                                                                                                                                                                                                                                     |                |
| BMI (324)                                                                                                                                                                                                                                                                                                                                           | <b>0.016</b>   |
| Physical component summary SF-36 (314)                                                                                                                                                                                                                                                                                                              | <b>0.028</b>   |
| Mental component summary SF-36 (314)                                                                                                                                                                                                                                                                                                                | 0.88           |
|                                                                                                                                                                                                                                                                                                                                                     |                |
| Mixed model using dependent variable PA level at 6 months<br>Independent variables; correlates of PA in a univariate fashion (fixed factor)<br>Baseline covariates; age, sex, social situation, economy, education, smoking and additionally intervention of care at 6 months (random factors)<br>Statistical significance was set at $p \leq 0.05$ |                |
