# Supplementary material for: Which patients benefit from physical activity on prescription (PAP)? A prospective observational analysis of factors that predict increased physical activity
Source: Springer Nature journal article supplement (doi:10.1186/s12889-019-6830-1), 2019-05-02
Supplement: MOESM2 [file 16691984]

**Additional file 2** Percent of patients with increased PA-level ( $\Delta$ -value) at 6-month follow-up, analysed with 3-4 baseline predictive correlates

| Correlate of PA (n)       | Increased PA-level<br>( $\Delta$ value) |                 |                             |                 |
|---------------------------|-----------------------------------------|-----------------|-----------------------------|-----------------|
|                           | % of patients                           |                 | <i>p</i> value <sup>a</sup> | phi coefficient |
|                           | Positive values                         | Negative values |                             |                 |
| CONF/PREP/SEE (82/68)     | 80.5                                    | 72.1            | 0.224                       | 0.10            |
| CONF/PREP/SEE/PCS (47/36) | 87.2                                    | 72.2            | 0.086                       | 0.19            |

*PA-level* physical activity level according to ACSM/AHA questionnaire, *CONF* readiness to change confident, *PREP* readiness to change – prepared, *SEE* self-efficacy expectations, *PCS* physical component summary – SF-36

Cut-points regarding positively assessed values were: CONF > 68 mm, PREP > 86 mm, SEE  $\geq$  4.77 points, PCS  $\geq$  47.06 points

<sup>a</sup>*P* values were determined by Chi-square test for independence

Statistical significance was set at  $p \leq 0.05$
