# Supplementary material for: Which patients benefit from physical activity on prescription (PAP)? A prospective observational analysis of factors that predict increased physical activity
Source: Springer Nature journal article supplement (doi:10.1186/s12889-019-6830-1), 2019-05-02
Supplement: MOESM3 [file 16691984]

**Additional file 3** Percent of patients with increased PA-level ( $\Delta$ -value) at 6-month follow-up, analysed with low vs. high PA at baseline and 1-3 baseline predictive correlates

| Correlate of PA (n)        | Increased PA-level ( $\Delta$ value) |                      |                      |                 |
|----------------------------|--------------------------------------|----------------------|----------------------|-----------------|
|                            | % of patients                        |                      | p value <sup>a</sup> | phi coefficient |
|                            | Low/Positive values                  | High/Negative values |                      |                 |
| PABL/SEE (71/48)           | 86.6                                 | 65.8                 | <b>0.002</b>         | 0.25            |
| PABL/PREP (79/48)          | 86.8                                 | 60.8                 | <b>&lt;0.001</b>     | 0.30            |
| PABL/CONF (79/46)          | 90.8                                 | 58.2                 | <b>&lt;0.001</b>     | 0.38            |
| PABL/PCS (80/48)           | 87.0                                 | 58.5                 | <b>&lt;0.001</b>     | 0.32            |
| PABL/BMI (57/70)           | 87.7                                 | 61.4                 | <b>&lt;0.001</b>     | 0.28            |
| PABL/CONF/PREP (59/27)     | 90.8                                 | 54.0                 | <b>&lt;0.001</b>     | 0.42            |
| PABL/CONF/PREP/SEE (40/19) | 95.2                                 | 65.5                 | <b>0.001</b>         | 0.39            |
|                            |                                      |                      |                      |                 |
|                            | Low/Negative values                  | High/Positive values |                      |                 |
| PABL/SEE (65/55)           | 79.3                                 | 62.5                 | <b>0.017</b>         | 0.18            |
| PABL/PREP (68/62)          | 80.0                                 | 67.4                 | 0.058                | 0.14            |
| PABL/CONF (67/64)          | 76.1                                 | 69.6                 | 0.322                | 0.07            |
| PABL/PCS (63/63)           | 78.8                                 | 70.8                 | 0.235                | 0.09            |
| PABL/BMI (91/49)           | 81.3                                 | 75.4                 | 0.355                | 0.07            |
| PABL/CONF/PREP (47/43)     | 75.8                                 | 68.3                 | 0.347                | 0.08            |
| PABL/CONF/PREP/SEE (30/26) | 76.9                                 | 65.0                 | 0.234                | 0.13            |

*PA-level* physical activity level according to ACSM/AHA questionnaire, *PABL* physical activity at baseline, *SEE* self-efficacy expectations, *PREP* readiness to change – prepared, *CONF* readiness to change – confident, *PCS* physical component summary - SF-36, *BMI* body mass index  
<sup>a</sup>*P* values were determined by Chi-square test for independence  
Statistical significance was set at  $p \leq 0.05$
