# Supplementary material for: Which patients benefit from physical activity on prescription (PAP)? A prospective observational analysis of factors that predict increased physical activity
Source: Springer Nature journal article supplement (doi:10.1186/s12889-019-6830-1), 2019-05-02
Supplement: MOESM4 [file 16691984]

**Additional file 4** Percent of patients with reached PA-level  $\geq 5p$  at 6-month follow-up, analysed with 3-4 baseline predictive correlates

| Correlate of PA (n)       | Reached PA-level<br>( $\geq 5p$ ) |                 |                      |                 |
|---------------------------|-----------------------------------|-----------------|----------------------|-----------------|
|                           | % of patients                     |                 | p value <sup>a</sup> | phi coefficient |
|                           | Positive values                   | Negative values |                      |                 |
| CONF/PREP/SEE (82/68)     | 50.0                              | 33.8            | <b>0.046</b>         | 0.16            |
| CONF/PREP/SEE/PCS (47/36) | 55.3                              | 22.2            | <b>0.002</b>         | 0.33            |

*PA-level* physical activity level according to ACSM/AHA questionnaire, *CONF* readiness to change confident, *PREP* readiness to change – prepared, *SEE* self-efficacy expectations, *PCS* physical component summary – SF-36.

Cut-points regarding positively assessed values were: CONF > 68 mm, PREP > 86 mm, SEE  $\geq 4.77$  points, PCS  $\geq 47.06$  points

<sup>a</sup>*P* values were determined by Chi-square test for independence

Statistical significance was set at  $p \leq 0.05$
