# Supplementary material for: Which patients benefit from physical activity on prescription (PAP)? A prospective observational analysis of factors that predict increased physical activity
Source: Springer Nature journal article supplement (doi:10.1186/s12889-019-6830-1), 2019-05-02
Supplement: MOESM5 [file 16691984]

**Additional file 5** Percent of patients with reached PA-level  $\geq 5p$  at 6-month follow-up, analysed with low vs. high PA at baseline and 1-3 baseline predictive correlates

| Correlate of PA (n)        | Reached PA-level<br>( $\geq 5p$ ) |                      |                             |                 |
|----------------------------|-----------------------------------|----------------------|-----------------------------|-----------------|
|                            | % of patients                     |                      | <i>p</i> value <sup>a</sup> | phi coefficient |
|                            | Low/Positive values               | High/Negative values |                             |                 |
| PABL/SEE (36/34)           | 43.9                              | 46.6                 | 0.739                       | 0.02            |
| PABL/PREP (39/33)          | 42.9                              | 41.8                 | 0.886                       | 0.01            |
| PABL/CONF (38/32)          | 43.7                              | 40.5                 | 0.679                       | 0.03            |
| PABL/PCS (36/33)           | 39.1                              | 40.2                 | 0.881                       | 0.01            |
| PABL/BMI (28/48)           | 43.1                              | 42.1                 | 0.899                       | 0.01            |
|                            |                                   |                      |                             |                 |
| PABL/CONF/PREP (29/19)     | 44.6                              | 38.0                 | 0.476                       | 0.07            |
| PABL/CONF/PREP/SEE (21/13) | 50.0                              | 44.8                 | 0.668                       | 0.05            |
|                            |                                   |                      |                             |                 |
|                            | Low/Negative values               | High/Positive values |                             |                 |
| PABL/SEE (26/39)           | 31.7                              | 44.3                 | 0.091                       | 0.13            |
| PABL/PREP (28/47)          | 32.9                              | 51.1                 | <b>0.015</b>                | 0.18            |
| PABL/CONF (28/48)          | 31.8                              | 52.2                 | <b>0.006</b>                | 0.21            |
| PABL/PCS (28/47)           | 35.0                              | 52.8                 | <b>0.020</b>                | 0.18            |
| PABL/BMI (41/37)           | 36.6                              | 56.9                 | <b>0.009</b>                | 0.20            |
|                            |                                   |                      |                             |                 |
| PABL/CONF/PREP (18/34)     | 29.0                              | 54.0                 | <b>0.005</b>                | 0.25            |
| PABL/CONF/PREP/SEE (10/20) | 25.6                              | 50.0                 | <b>0.026</b>                | 0.25            |
|                            |                                   |                      |                             |                 |

*PA-level*  $\geq 5p$  physical activity level according to ACSM/AHA questionnaire and public health recommendation, *PABL* physical activity at baseline, *SEE* self-efficacy expectations, *PREP* readiness to change – prepared, *CONF* readiness to change – confident, *PCS* physical component summary - SF-36, *BMI* body mass index  
<sup>a</sup>*P* values were determined by Chi-square test for independence  
Statistical significance was set at  $p \leq 0.05$
